# Supplementary material for: Circulating Levels of CILP2 Are Elevated in Coronary Heart Disease and Associated with Atherosclerosis
Source: Oxid Med Cell Longev. 2020 Oct 31;2020:1871984. doi: 10.1155/2020/1871984 (PMC7652603; doi:10.1155/2020/1871984)
Supplement: Supplementary Materials — See Supplementary Figures 1-5 and Supplementary Tables 1–3 in the Supplementary Material for comprehensive image analysis. Supplementary Table 1: the specific sequences used for CD36 promoter recombinant plasmids and site-directed mutation. Supplementary Table 2: the specific primers sequence used for RT-qPCR analysis. Supplementary Table 3: row mean scores and Cochran–Armitage trend test of the impact of circulating CILP2 on CHD patients. Supplementary Figure 1: flow of the study. Supplementary Figure 2: circulating CILP2 levels in SD-fed WT and ApoE KO mice (n = 6 for each group). Data are shown as mean ± SD. ∗∗p < 0.01 vs.C57BL/6J. Supplementary Figure 3: circulating CILP2 levels in SD- or HFD-fed ApoE KO mice. Eight-week-old male ApoE KO mice were divided into two groups (n = 6 for each group) and fed with a SD or HFD for 12 weeks. Data were shown as mean ± SD. ∗p < 0.05 vs. prefeeding. Supplementary Figure 4: the expression of CILP2 protein was found in the cultured THP-1 macrophages (A), THP-1 macrophages were transfected successfully by Ad-CILP2, and CILP2 expression was markedly evaluated at both mRNA and protein (B-D). Data are shown as mean ± SEM. ∗∗p < 0.01 vs. GFP. Supplementary Figure 5: cell apoptosis was determined by flow cytometry assay. Data were shown as mean ± SEM. ∗∗p < 0.01 vs. 0 h. [file 1871984.f1.docx]

**Supplementary materials**

**Circulating levels of CILP-2 are elevated in coronary heart disease and associated with atherosclerosis**

Wenjing Hu1*, Ke Li2*, Hongdong Han2*, Shan Geng2, Baoyong Zhou3, Xiaoyun Fan1, Shangcheng Xu1, Mengliu Yang4, Hua Liu5, Gangyi Yang1, Yongsheng Liu1

1Chongqing Prevention and Treatment Hospital for OccupationalDiseases,400000, Chongqing, China

2Department of Endocrinology, the Second Affiliated Hospital ,400000, Chongqing Medical University, Chongqing, China.

3Department of Hepatobiliary Surgery, First Affiliated Hospital, 400000,Chongqing Medical University, Chongqing, China

4School of Biomedical Sciences, the University of Queensland, 4702, Brisbane, Australia.

5Department of Pediatrics, University of Mississippi Medical Center, 32099, 2500 North State Street, 39200, Jackson, Mississippi, MS 39216-4505, USA

Wenjing Hu: 273297582@qq.com; Ke Li: [791450945@qq.com](mailto:791450945@qq.com); Hongdong Han:519699817@qq.com; Shan Geng: 83612914@qq.com; Baoyong Zhou: sdlylczhzh@163.com: Xiaoyun Fan: [188111010@qq.com](mailto:188111010@qq.com): Shangcheng Xu:xushangchengmito@163.com; Mengliu Yang: [yangmengliu@hotmail.com](mailto:184257881@qq.com); Hua Liu: hliu@umc.edu; Gangyi Yang: [gangyiyang@163.com](mailto:gangyiyang@163.com); Yongsheng Liu: [a273297582@126.com](mailto:a273297582@126.com);

**Running Head:** CILP-2 is associated with atherosclerosis.

*These authors contributed equally to this project

**Corresponding Author:** Gangyi Yang, E-mail: [gangyiyang@163.com](mailto:gangyiyang@163.com). and Yongsheng Liu, Chongqing Prevention and Treatment Hospital for Occupational Diseases, Chongqing, China. E-mail: [273297582@qq.com](mailto:273297582@qq.com) , +86-23-68485216 / Fax: +86-23-68485005.

Category: Original Article

**Word count of the abstract:** 243

**Word count of the main text:** 3933

**Table: *2* Figures:** 5**References:** 34

**Clinical Trial Registration Number:** ChiCTR-OPC-14005324 **Table S1** The specific sequences used for CD36 promoter recombinant plasmids and site-directed mutation

| Promoter region | Primer |
| --- | --- |
| -404/187 | F: CCGCTCGAGCGGCGCAAGCTCAGTCAAGACAGGGAAGTG |
|  | R: CCCAAGCTTGGGCAGTAGTGTCACCTCCCGTCATCTGGGTGATG |
| -311/+187 | F: CCGCTCGAGCGGGTTAGGGGAAACTCAGCAAGTCAGTTC |
|  | R: CCCAAGCTTGGGCAGTAGTGTCACCTCCCGTCATCTGGGTGATG |
| -225/+187 | F: CCGCTCGAGCGGGCTGAATATCTCAGATATAGGTAATGGGTC |
|  | R: CCCAAGCTTGGGCAGTAGTGTCACCTCCCGTCATCTGGGTGATG |
| -102/187 | F: CCGCTCGAGCGGCCACACACTGGGATCTGACACTGTAG |
|  | R: CCCAAGCTTGGGCAGTAGTGTCACCTCCCGTCATCTGGGTGATG |
| mut PPRE-G | F: GTCAGTTCCTTTTGTTTTTCCAGCTTCTAACTTACTTGGATGGG |
|  | R: CCCATCCAAGTAAGTTAGAAGCTGGAAAAACAAAAGGAACTGAC |
| mut PPRE-J | F:GACCCTTATTAGCCATATCAGGCATGTACTGTATGGGGGATTTTTTTT |
|  | R: AAAAAAAATCCCCCATACAGTACATGCCTGATATGGCTAATAAGGGTC |

**Table S2** The specific primers sequence used for RT-PCR analysis

| Gene | Forward and reverse primers | Amplified fragment (bp) | Annealing  temperature (ºC) |
| --- | --- | --- | --- |
| β-actin | 5'-GCTGTCCCTGTATGCCTCT-3' | 220 | 55 |
| 5'-GATGTCACGCACGATTTCC-3' |
| CILP2 | 5’-GTGTGGTATGGAATGGAGTT-3’ | 119 | 55 |
| 5’-TACGCACGAGAAGTCAGA-3’ |
| cilp2 | 5’- AGACTCAGGCCTTAGGTGGA -3’ | 86 | 62.5 |
| 5’- GTTTGCAGTTCTCATCCCTCT -3’ |
| SR-A | 5’-CACCTTGACACTACACCCTT-3’ | 142 | 50 |
| 5’- TTCCTCTTCGCTGTCATTTC -3’ |
| CD36 | 5’- TAACCCAGGACGCTGAGGA-3’ | 115 | 50 |
| 5’-GCCAGATTGAGAACTGTGAAG-3’’ -3’ |
| LOX-1 | 5’- CCCTCAAAGTGTCACAATGCT -3’ | 140 | 50 |
| 5’-GCAAAGTGAAAGAAGCCAGAC-3’ -3’ |

**Table S3** Row Mean Scores and Cochran–Armitage Trend test of the impact of circulating CILP2 on CHD patients

|  |  | CAD | |  |
| --- | --- | --- | --- | --- |
| Model adjusted |  | X2 | *p* |  |
| Row Mean Scores Test |  | 45.1422 | < 0.0001 |  |
| Cochran–Armitage Trend Test |  | -4.7658 | < 0.0001 |  |

**Analysis**

Analysed (n = 105)

Excluded from analysis (n = 0)

Allocated to intervention (CHD = 170)

Received allocated intervention (n = 169)

Did not receive allocated intervention (n = 1)

Excluded (n = 61)

-Not meeting inclusion criteria (n = 51)

-Declined to participate (n = 10)

-Other reasons (n = 0)

**Enrollment**

Allocated to intervention (NS = 110)

Received allocated intervention (n = 105)

Did not receive allocated intervention (n= 5)

Assessed for eligibility (CHD > 150, NS > 150)

**Allocation**

Analysed (n=167)

Excluded from analysis (n = 2)

**Figure S1** Flow of the study


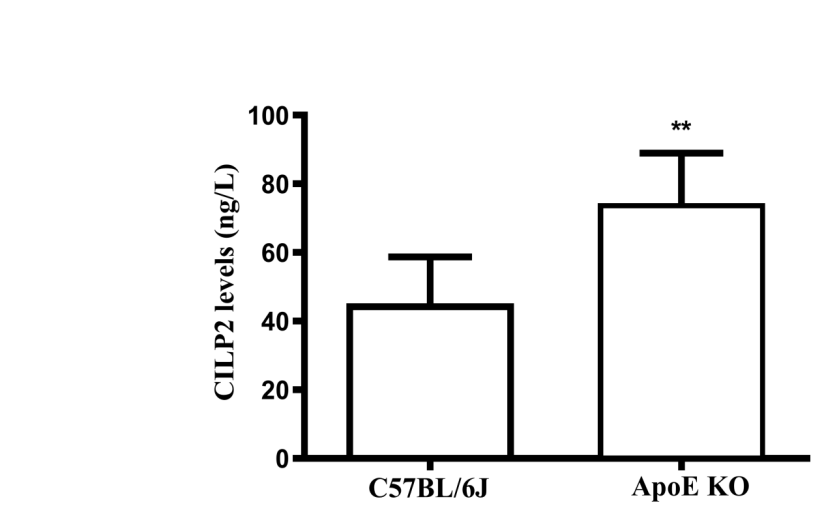


**Figure S2** Circulating CILP2 levels in SD-fed WT and ApoE KO mice (n = 6 for each group). Data were shown as mean ± SD. ***p* < 0.01 *vs.* C57BL/6J.


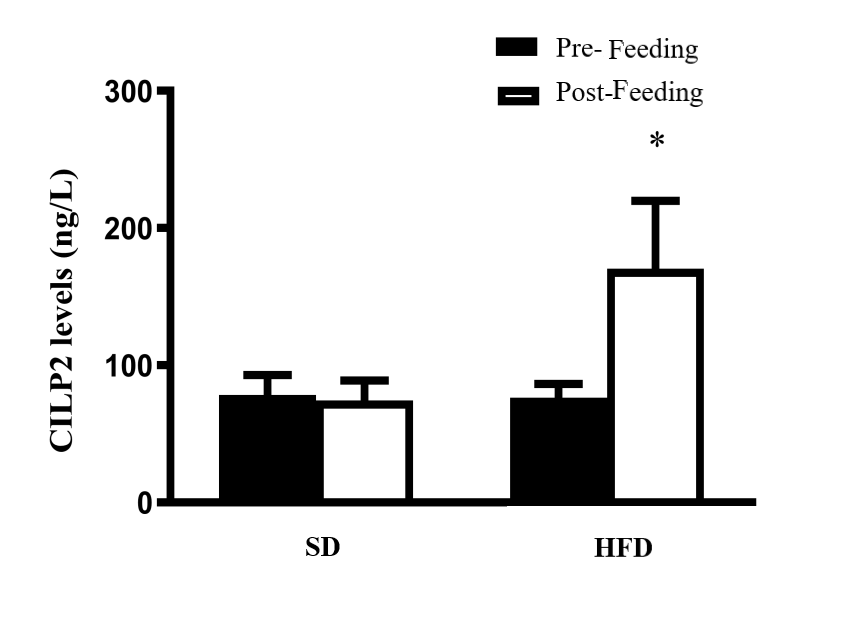


**Figure S3** Circulating CILP2 levels in SD- or HFD-fed ApoE KO mice. Eight-week-old male ApoE KO mice were divided into two groups (n = 6 for each group) and fed with a SD or HFD for 12 weeks. Data were shown as mean ± SD. * *p* < 0.05 *vs.* pre-feeding.


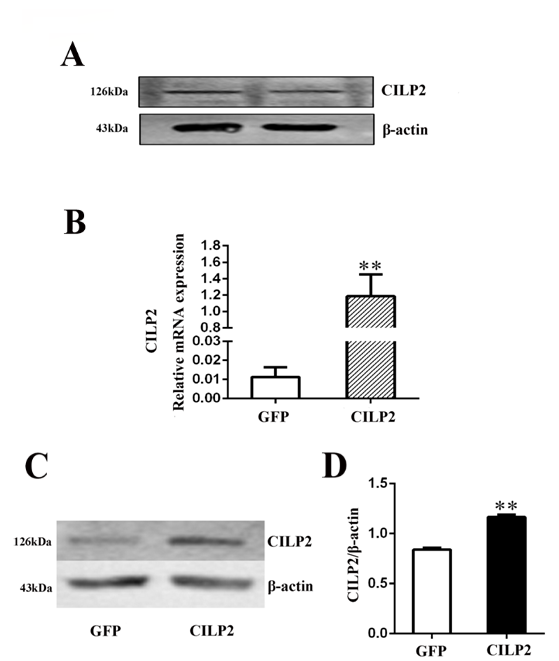


**Figure S4** The expression of CILP2 protein was found in the cultured THP-1 macrophages (A), THP-1 macrophages were transfected successfully by Ad-*CILP2*, and CILP2 expression was markedly evaluated at both mRNA and protein (B-D). Data are shown as mean ± SEM. ***p* < 0.01 *vs.* GFP.


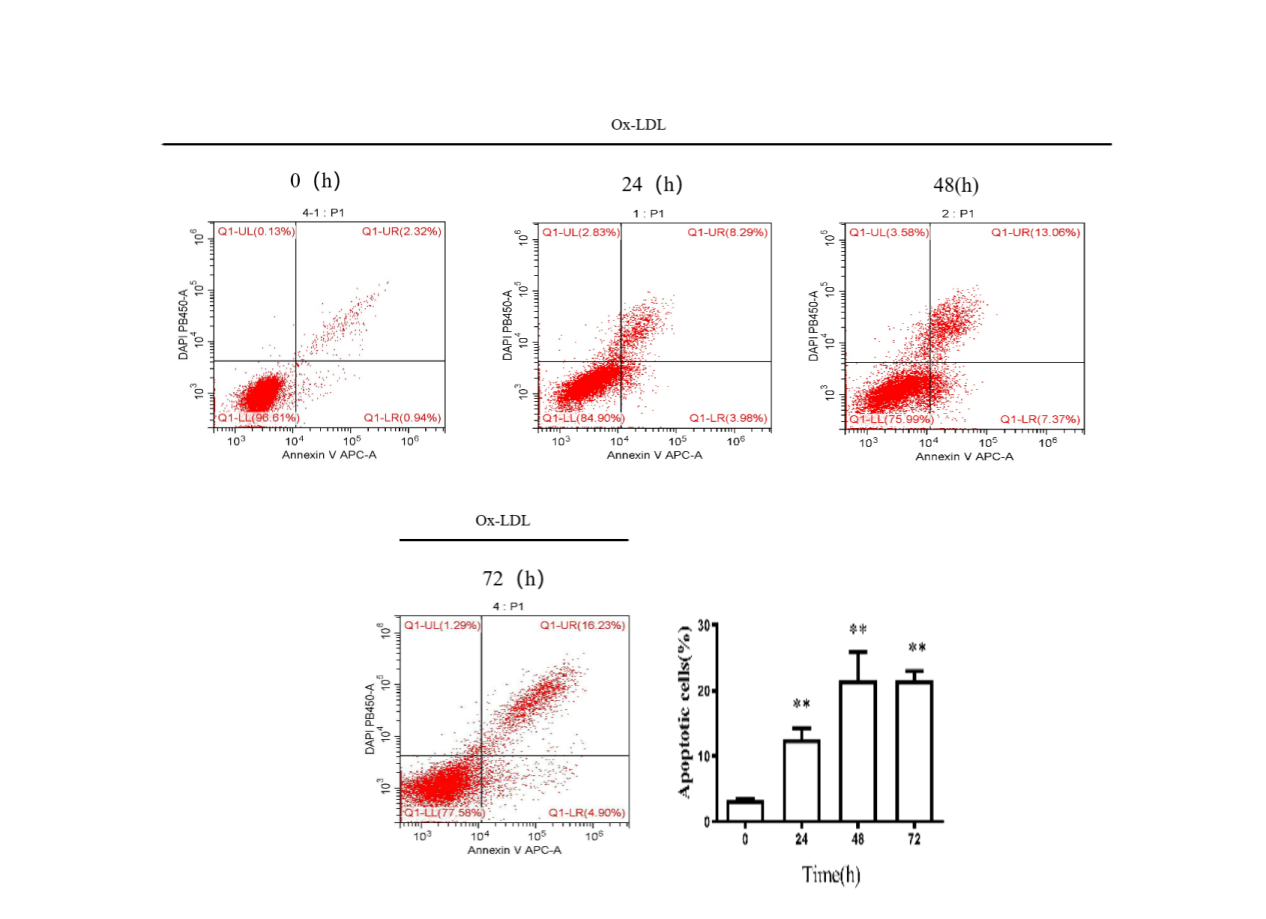


**Figure S5** Cell apoptosis was determined by flow cytometry assay. Data were shown as mean ± SEM. ***p* < 0.01 *vs.* 0 h.
